# Supplementary material for: Post-operative radiotherapy is beneficial for T1/T2 triple negative breast cancer patients with four or more positive lymph nodes
Source: PubMed Central journal article supplement (PMC5522115; doi:10.18632/oncotarget.17170), 2017-04-18
Supplement: oncotarget-08-42917-s001.pdf [file oncotarget-08-42917-s001.pdf]

## Post-operative radiotherapy is beneficial for T1/T2 triple negative breast cancer patients with four or more positive lymph nodes

### SUPPLEMENTARY MATERIALS

#### SUPPLEMENTARY TABLES

**Supplementary Table 1: Prognostic factors of DFS in triple negative breast cancer patients with  $\geq 4$  positive lymph nodes using the Cox proportional hazards model**

| Variables                    | Hazard Ratio (Univariate<br>95% CI) | <i>p</i> -value | Hazard Ratio<br>(Multivariate 95% CI) | <i>p</i> -value |
|------------------------------|-------------------------------------|-----------------|---------------------------------------|-----------------|
| Age (years)                  |                                     |                 |                                       |                 |
| $\geq 45$ vs. $< 45$         | 1.36(0.829-2.231)                   | 0.223           |                                       |                 |
| Tumor size                   |                                     |                 |                                       |                 |
| $\geq 2$ cm vs. $< 2$ cm     | 2.106(1.142-3.386)                  | 0.017           | 2.128(1.153-3.927)                    | 0.016           |
| Histological grade           |                                     |                 |                                       |                 |
| G1-2 vs. G3                  | 0.797(0.462-1.377)                  | 0.417           |                                       |                 |
| Ki67 status                  |                                     |                 |                                       |                 |
| $\geq 14\%$ vs. $< 14\%$     | 1.012(0.639-1.602)                  | 0.96            |                                       |                 |
| P53 status                   |                                     |                 |                                       |                 |
| Positive vs. Negative        | 1.234(0.795-1.915)                  | 0.348           |                                       |                 |
| Post-mastectomy radiotherapy |                                     |                 |                                       |                 |
| Yes VS. No                   | 0.633(0.412-0.974)                  | 0.038           | 0.627(0.407-0.964)                    | 0.034           |

**Supplementary Table 2: Prognostic factors of LRFS in triple negative breast cancer patients with  $\geq 4$  positive lymph nodes using the Cox proportional hazards model**

| Variables                    | Hazard Ratio<br>(Univariate 95% CI) | <i>p</i> -value | Hazard Ratio<br>(Multivariate 95% CI) | <i>p</i> -value |
|------------------------------|-------------------------------------|-----------------|---------------------------------------|-----------------|
| Age (years)                  |                                     |                 |                                       |                 |
| $\geq 45$ vs. $<45$          | 0.903(0.466-1.750)                  | 0.763           |                                       |                 |
| Tumor size                   |                                     |                 |                                       |                 |
| $\geq 2$ cm vs. $<2$ cm      | 4.367(1.345-14.177)                 | 0.014           | 4.484(1.381-14.562)                   | 0.013           |
| Histological grade           |                                     |                 |                                       |                 |
| G1-2 vs. G3                  | 1.328(0.661-2.667)                  | 0.426           |                                       |                 |
| Ki67 status                  |                                     |                 |                                       |                 |
| $\geq 14\%$ vs. $< 14\%$     | 0.904(0.472-1.731)                  | 0.76            |                                       |                 |
| P53 status                   |                                     |                 |                                       |                 |
| Positive vs. Negative        | 1.550(0.833-2.885)                  | 0.166           |                                       |                 |
| Post-mastectomy radiotherapy |                                     |                 |                                       |                 |
| Yes VS. No                   | 0.456(0.242-0.859)                  | 0.015           | 0.445(0.236-0.837)                    | 0.012           |
